# Supplementary material for: The Milk Thistle (Silybum marianum) Compound Silibinin Inhibits Cardiomyogenesis of Embryonic Stem Cells by Interfering with Angiotensin II Signaling
Source: Hindawi journal article supplement (doi:10.1155/2018/9215792), 2018-12-13
Supplement: f1 [file 9215792.f1.pdf]

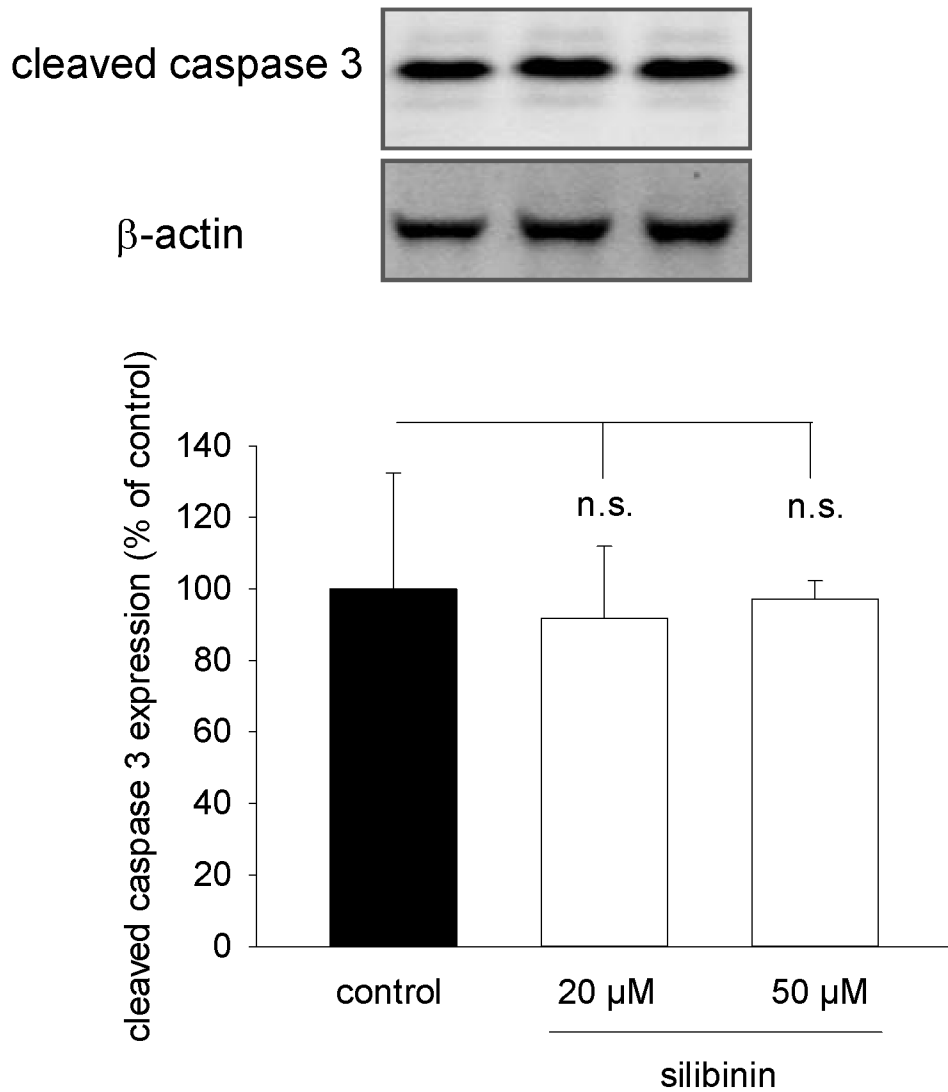

Supplemental Fig. 1. Effect of silibinin on apoptosis induction in differentiating ES cells. Embryoid bodies were treated from day 3 to day 10 of differentiation with silibinin (20, 50 μM) and cleaved caspase 3 expression was evaluated by western blot (n = 5). β-actin was used as loading control. n.s., not significant.

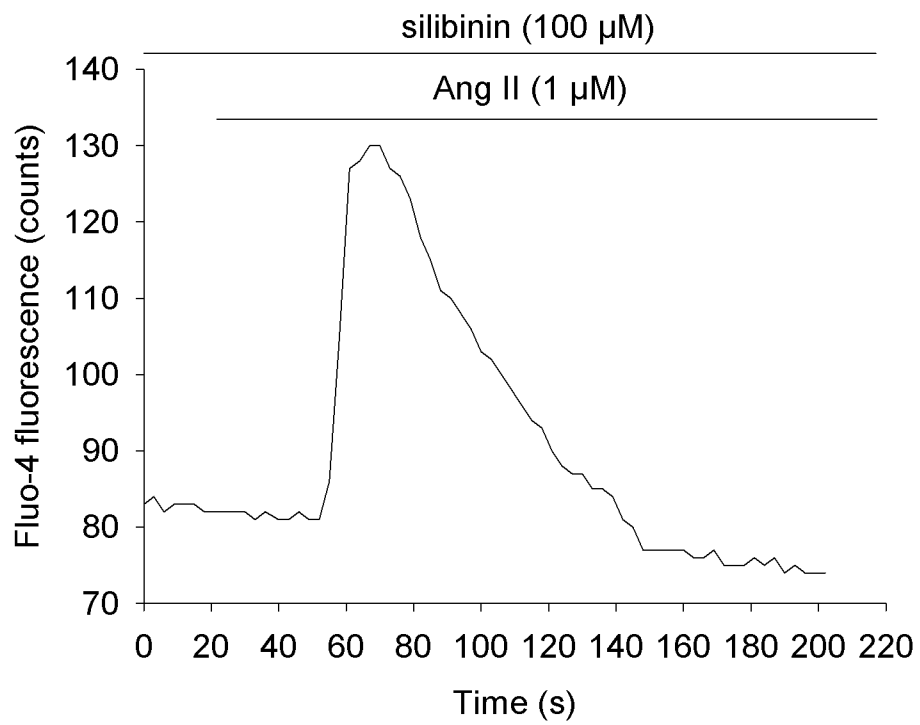

Supplemental Fig.2. Effect of pre-incubation (60 min) with silibinin (100 μM) on Ang II-induced Ca<sup>2+</sup> transients in adult rat smooth muscle cells.
